# Supplementary material
Source: publisher figshare collection journal article supplement (https://acs.figshare.com/ndownloader/files/3887761)
Supplement: Supplementary file 1 [file 3887761]

## Multiply twinned AgNi alloy nanoparticles as highly active catalyst for multiple reduction and degradation reactions

Mukesh Kumar, Sasanka Deka\*

Department of Chemistry, University of Delhi, North campus, Delhi-110007, India

Fax: (+) 91-11-27667206, E-mail: [sdeka@chemistry.du.ac.in](mailto:sdeka@chemistry.du.ac.in), [ssdeka@gmail.com](mailto:ssdeka@gmail.com)

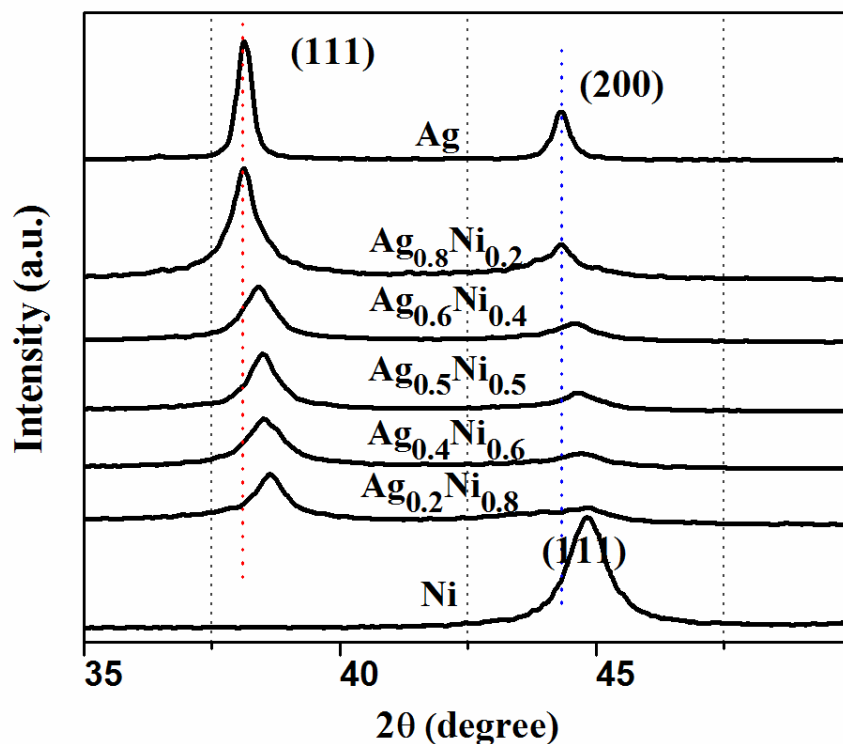

**Figure S1.** A magnified  $2\theta$  range ( $35\text{--}50^\circ$ ) elaborating the peak position shifting and changing of peak intensity with Ag/Ni contents for all the as-synthesized samples.

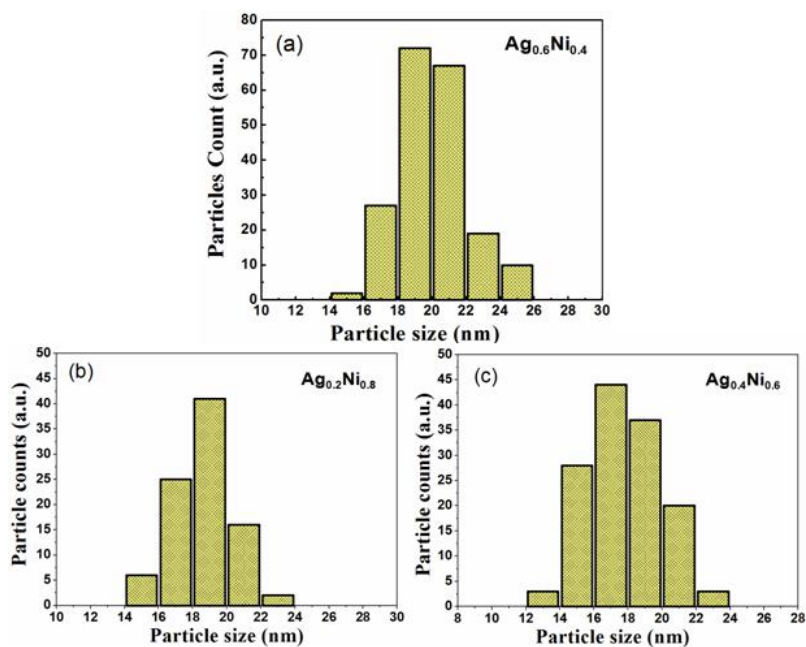

**Figure S2.** Particle size distribution form TEM micrographs for (a)  $\text{Ag}_{0.6}\text{Ni}_{0.4}$ , (b)  $\text{Ag}_{0.2}\text{Ni}_{0.8}$  and (c)  $\text{Ag}_{0.4}\text{Ni}_{0.6}$  alloy nanoparticles.

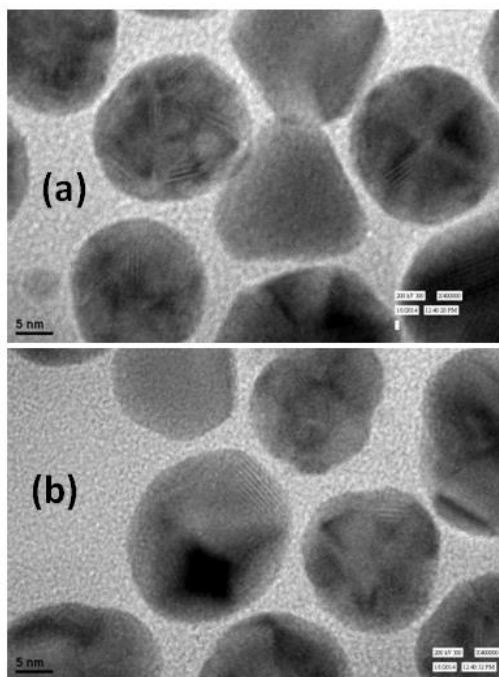

**Figure S3.** HRTEM images show the presence of twinned nanostructures oriented in different directions in which mainly five crystalline domains separated with twinned boundaries.

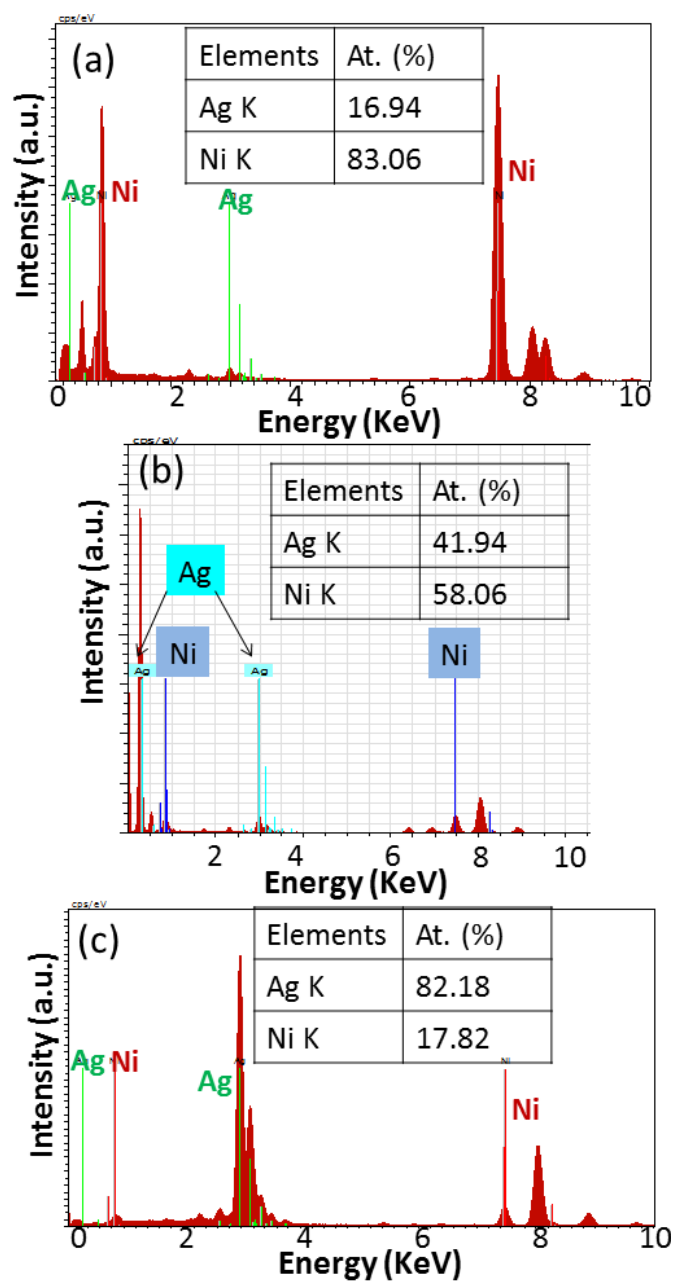

**Figure S4.** EDAX analysis of (a)  $\text{Ag}_{0.2}\text{Ni}_{0.8}$ , (b)  $\text{Ag}_{0.4}\text{Ni}_{0.6}$  and (c)  $\text{Ag}_{0.8}\text{Ni}_{0.2}$  alloy NPs.
